# Supplementary material for: Soundscape Perceptions and Preferences for Different Groups of Users in Urban Recreational Forest Parks
Source: MDPI journal article supplement (doi:10.3390/f12040468), 2021-04-12
Supplement: s1 [file s1]

SCALE

QUESTIONNAIRE

**Perception of urban parks' soundscape questionnaire**

Date:

Location:

Start time:

End time:

**Section 1**

How old are you? (     )

What is your gender?

|   |       |       |
|---|-------|-------|
| 1 | _____ | _____ |
| 2 | _____ | _____ |

☐ Male☐ Female

Do you have any companion with you during this visit?

|   |       |       |
|---|-------|-------|
| 1 | _____ | _____ |
| 2 | _____ | _____ |
| 3 | _____ | _____ |
| 4 | _____ | _____ |
| 5 | _____ | _____ |

☐ Alone☐ Two people☐ Three to five people☐ Small family☐ Big family

What is the highest level of education you have completed?

|   |       |       |
|---|-------|-------|
| 1 | _____ | _____ |
| 2 | _____ | _____ |
| 3 | _____ | _____ |
| 4 | _____ | _____ |
| 5 | _____ | _____ |
| 6 | _____ | _____ |
| 7 | _____ | _____ |
| 8 | _____ | _____ |
| 9 | _____ | _____ |

☐ Primary school☐ Secondary school☐ Secondary school graduate☐ Trade/technical/vocational college☐ Trade/technical/vocational college graduate☐ Some college☐ College graduate☐ Some postgraduate work☐ Post graduate degree

What is your occupational status?

|   |       |       |
|---|-------|-------|
| 1 | _____ | _____ |
| 2 | _____ | _____ |
| 3 | _____ | _____ |
| 4 | _____ | _____ |
| 5 | _____ | _____ |

☐ Employed☐ Unemployed☐ Retired☐ Student☐ Other

What is your monthly income? (RMB)

|   |       |       |
|---|-------|-------|
| 1 | _____ | _____ |
| 2 | _____ | _____ |
| 3 | _____ | _____ |
| 4 | _____ | _____ |
| 5 | _____ | _____ |

☐ <1000☐ 1000-4000☐ 4000-7000☐ 7000-10000☐ >10000

Where do you live for a long time ?

|   |       |       |
|---|-------|-------|
| 1 | _____ | _____ |
| 2 | _____ | _____ |

☐ Village☐ City

1

2

3

1

2

3

4

5

1

2

3

4

5

6

1

2

3

4

1

2

3

4

5

6

7

8

PO

1

2

3

4

5

Never

Occasionally

Moderately

Frequently

Always

What is your residential status?

☐ Local resident

☐ Tourist

☐ Other

What is the distance from your current residence to here?

☐ 0-500

☐ 500-1500

☐ 1500-3000

☐ 3000-4500

☐ >4500

How often do you visit this place?

☐ Rarely

☐ Several times in a year

☐ Once in a month

☐ Once in a week

☐ Twice or thrice in a week

☐ Everyday

How long have you been here?

☐ <30min

☐ 30min-1h

☐ 1-3h

☐ >3h

What kind of activities do you usually do here?

☐ Parent-child activities

☐ Fitness and health activities

☐ Sports and leisure activities

☐ Social activities

☐ Specialized activities

☐ Quiet activities

☐ Public participation activities

☐ Other

Section 2

What is the occurrence of birds sound in this place?

☐ Never

☐ Occasionally

☐ Moderately

☐ Frequently

☐ Always

(trigger)

How loud is this sound in this place?

☐ Very quiet

☐ Quiet

☐ Moderate

☐ Loud

☐ Very loud

Do you like this sound in this place?

☐ Very negative

☐ Negative

☐ Moderate

☐ Positive

☐ Very positive

Can you see the visual source of this sound at here?

☐ Yes

☐ No

What is the occurrence of insects sound in this place?

PL

1

Very quiet

2

Quiet

3

Moderate

4

Loud

5

Very loud

PR

1

Very negative

2

Negative

3

Moderate

4

Positive

5

Very positive

VS

1

Yes

2

No

☐ Never
 ☐ Occasionally
 ☐ Moderately
 ☐ Frequently
 ☐ Always

(trigger)

How loud is this sound in this place?

☐ Very quiet
 ☐ Quiet
 ☐ Moderate
 ☐ Loud
 ☐ Very loud

Do you like this sound in this place?

☐ Very negative
 ☐ Negative
 ☐ Moderate
 ☐ Positive
 ☐ Very positive

Can you see the visual source of this sound at here?

☐ Yes
 ☐ No

What is the occurrence of leaves rustling sound in this place?

☐ Never
 ☐ Occasionally
 ☐ Moderately
 ☐ Frequently
 ☐ Always

(trigger)

How loud is this sound in this place?

☐ Very quiet
 ☐ Quiet
 ☐ Moderate
 ☐ Loud
 ☐ Very loud

Do you like this sound in this place?

☐ Very negative
 ☐ Negative
 ☐ Moderate
 ☐ Positive
 ☐ Very positive

Can you see the visual source of this sound at here?

☐ Yes
 ☐ No

What is the occurrence of ducks sound in this place?

☐ Never
 ☐ Occasionally
 ☐ Moderately
 ☐ Frequently
 ☐ Always

(trigger)

How loud is this sound in this place?

☐ Very quiet
 ☐ Quiet
 ☐ Moderate
 ☐ Loud
 ☐ Very loud

Do you like this sound in this place?

☐ Very negative
 ☐ Negative
 ☐ Moderate
 ☐ Positive
 ☐ Very positive

Can you see the visual source of this sound at here?

☐ Yes
 ☐ No

What is the occurrence of dogs sound in this place?

☐ Never
 ☐ Occasionally
 ☐ Moderately
 ☐ Frequently
 ☐ Always

(trigger)

How loud is this sound in this place?

☐ Very quiet
 ☐ Quiet
 ☐ Moderate
 ☐ Loud
 ☐ Very loud

Do you like this sound in this place?

☐ Very negative
 ☐ Negative
 ☐ Moderate
 ☐ Positive
 ☐ Very positive

Can you see the visual source of this sound at here?

☐ Yes
 ☐ No

What is the occurrence of wind sound in this place?

☐ Never
 ☐ Occasionally
 ☐ Moderately
 ☐ Frequently
 ☐ Always

(trigger)

How loud is this sound in this place?

☐ Very quiet    ☐ Quiet    ☐ Moderate    ☐ Loud    ☐ Very loud

**Do you like this sound in this place?**

☐ Very negative    ☐ Negative    ☐ Moderate    ☐ Positive    ☐ Very positive

What is the **occurrence of water** sound in this place?

☐ Never    ☐ Occasionally    ☐ Moderately    ☐ Frequently    ☐ Always

(trigger)

**How loud is this sound in this place?**

☐ Very quiet    ☐ Quiet    ☐ Moderate    ☐ Loud    ☐ Very loud

**Do you like this sound in this place?**

☐ Very negative    ☐ Negative    ☐ Moderate    ☐ Positive    ☐ Very positive

**Can you see the visual source of this sound at here?**

☐ Yes    ☐ No

What is the **occurrence of square dancing** sound in this place?

☐ Never    ☐ Occasionally    ☐ Moderately    ☐ Frequently    ☐ Always

(trigger)

**How loud is this sound in this place?**

☐ Very quiet    ☐ Quiet    ☐ Moderate    ☐ Loud    ☐ Very loud

**Do you like this sound in this place?**

☐ Very negative    ☐ Negative    ☐ Moderate    ☐ Positive    ☐ Very positive

**Can you see the visual source of this sound at here?**

☐ Yes    ☐ No

What is the **occurrence of broadcast music** sound in this place?

☐ Never    ☐ Occasionally    ☐ Moderately    ☐ Frequently    ☐ Always

(trigger)

**How loud is this sound in this place?**

☐ Very quiet    ☐ Quiet    ☐ Moderate    ☐ Loud    ☐ Very loud

**Do you like this sound in this place?**

☐ Very negative    ☐ Negative    ☐ Moderate    ☐ Positive    ☐ Very positive

**Can you see the visual source of this sound at here?**

☐ Yes    ☐ No

What is the **occurrence of singing** sound in this place?

☐ Never    ☐ Occasionally    ☐ Moderately    ☐ Frequently    ☐ Always

(trigger)

**How loud is this sound in this place?**

☐ Very quiet    ☐ Quiet    ☐ Moderate    ☐ Loud    ☐ Very loud

**Do you like this sound in this place?**

☐ Very negative    ☐ Negative    ☐ Moderate    ☐ Positive    ☐ Very positive

**Can you see the visual source of this sound at here?**

☐ Yes    ☐ No

What is the occurrence of instrument sound in this place?

☐ Never ☐ Occasionally ☐ Moderately ☐ Frequently ☐ Always

(trigger)

How loud is this sound in this place?

☐ Very quiet ☐ Quiet ☐ Moderate ☐ Loud ☐ Very loud

Do you like this sound in this place?

☐ Very negative ☐ Negative ☐ Moderate ☐ Positive ☐ Very positive

Can you see the visual source of this sound at here?

☐ Yes ☐ No

What is the occurrence of lawn mowing sound in this place?

☐ Never ☐ Occasionally ☐ Moderately ☐ Frequently ☐ Always

(trigger)

How loud is this sound in this place?

☐ Very quiet ☐ Quiet ☐ Moderate ☐ Loud ☐ Very loud

Do you like this sound in this place?

☐ Very negative ☐ Negative ☐ Moderate ☐ Positive ☐ Very positive

Can you see the visual source of this sound at here?

☐ Yes ☐ No

What is the occurrence of construction sound in this place?

☐ Never ☐ Occasionally ☐ Moderately ☐ Frequently ☐ Always

(trigger)

How loud is this sound in this place?

☐ Very quiet ☐ Quiet ☐ Moderate ☐ Loud ☐ Very loud

Do you like this sound in this place?

☐ Very negative ☐ Negative ☐ Moderate ☐ Positive ☐ Very positive

Can you see the visual source of this sound at here?

☐ Yes ☐ No

What is the occurrence of engine sound in this place?

☐ Never ☐ Occasionally ☐ Moderately ☐ Frequently ☐ Always

(trigger)

How loud is this sound in this place?

☐ Very quiet ☐ Quiet ☐ Moderate ☐ Loud ☐ Very loud

Do you like this sound in this place?

☐ Very negative ☐ Negative ☐ Moderate ☐ Positive ☐ Very positive

Can you see the visual source of this sound at here?

☐ Yes ☐ No

What is the occurrence of bicycle riding sound in this place?

☐ Never ☐ Occasionally ☐ Moderately ☐ Frequently ☐ Always

(trigger)

How loud is this sound in this place?

☐ Very quiet ☐ Quiet ☐ Moderate ☐ Loud ☐ Very loud

Do you like this sound in this place?

☐ Very negative ☐ Negative ☐ Moderate ☐ Positive ☐ Very positive

Can you see the visual source of this sound at here?

☐ Yes ☐ No

What is the occurrence of surrounding speech in this place?

☐ Never ☐ Occasionally ☐ Moderately ☐ Frequently ☐ Always

(trigger)

How loud is this sound in this place?

☐ Very quiet ☐ Quiet ☐ Moderate ☐ Loud ☐ Very loud

Do you like this sound in this place?

☐ Very negative ☐ Negative ☐ Moderate ☐ Positive ☐ Very positive

Can you see the visual source of this sound at here?

☐ Yes ☐ No

What is the occurrence of playing children sound in this place?

☐ Never ☐ Occasionally ☐ Moderately ☐ Frequently ☐ Always

(trigger)

How loud is this sound in this place?

☐ Very quiet ☐ Quiet ☐ Moderate ☐ Loud ☐ Very loud

Do you like this sound in this place?

☐ Very negative ☐ Negative ☐ Moderate ☐ Positive ☐ Very positive

Can you see the visual source of this sound at here?

☐ Yes ☐ No

What is the occurrence of footsteps sound in this place?

☐ Never ☐ Occasionally ☐ Moderately ☐ Frequently ☐ Always

(trigger)

How loud is this sound in this place?

☐ Very quiet ☐ Quiet ☐ Moderate ☐ Loud ☐ Very loud

Do you like this sound in this place?

☐ Very negative ☐ Negative ☐ Moderate ☐ Positive ☐ Very positive

Can you see the visual source of this sound at here?

☐ Yes ☐ No



What is the occurrence of **diabolo** sound in this place?

☐ Never   ☐ Occasionally   ☐ Moderately   ☐ Frequently   ☐ Always

-----  
(trigger)

**How loud is this sound in this place?**

☐ Very quiet   ☐ Quiet   ☐ Moderate   ☐ Loud   ☐ Very loud

**Do you like this sound in this place?**

☐ Very negative   ☐ Negative   ☐ Moderate   ☐ Positive   ☐ Very positive

**Can you see the visual source of this sound at here?**

☐ Yes   ☐ No

What is the occurrence of **train** sound in this place?

☐ Never   ☐ Occasionally   ☐ Moderately   ☐ Frequently   ☐ Always

-----  
(trigger)

**How loud is this sound in this place?**

☐ Very quiet   ☐ Quiet   ☐ Moderate   ☐ Loud   ☐ Very loud

**Do you like this sound in this place?**

☐ Very negative   ☐ Negative   ☐ Moderate   ☐ Positive   ☐ Very positive

**Can you see the visual source of this sound at here?**

☐ Yes   ☐ No

What is the occurrence of **automobile** sound in this place?

☐ Never   ☐ Occasionally   ☐ Moderately   ☐ Frequently   ☐ Always

-----  
(trigger)

**How loud is this sound in this place?**

☐ Very quiet   ☐ Quiet   ☐ Moderate   ☐ Loud   ☐ Very loud

**Do you like this sound in this place?**

☐ Very negative   ☐ Negative   ☐ Moderate   ☐ Positive   ☐ Very positive

**Can you see the visual source of this sound at here?**

☐ Yes   ☐ No

What is the occurrence of **motorbike** sound in this place?

☐ Never   ☐ Occasionally   ☐ Moderately   ☐ Frequently   ☐ Always

-----  
(trigger)

**How loud is this sound in this place?**

☐ Very quiet   ☐ Quiet   ☐ Moderate   ☐ Loud   ☐ Very loud

**Do you like this sound in this place?**

☐ Very negative   ☐ Negative   ☐ Moderate   ☐ Positive   ☐ Very positive

**Can you see the visual source of this sound at here?**

☐ Yes   ☐ No

|                                                                            |                                                          |
|----------------------------------------------------------------------------|----------------------------------------------------------|
| <b>Section 3</b>                                                           |                                                          |
| <b>Are you satisfied with the overall sound environment in this place?</b> |                                                          |
| 1                                                                          | <input type="radio"/> Very unsatisfied                   |
| 2                                                                          | <input type="radio"/> Unsatisfied                        |
| 3                                                                          | <input type="radio"/> Neither satisfied, nor unsatisfied |
| 4                                                                          | <input type="radio"/> Satisfied                          |
| 5                                                                          | <input type="radio"/> Very satisfied                     |
| <b>What do you think of the loudness of this place?</b>                    |                                                          |
| 1                                                                          | <input type="radio"/> Very low                           |
| 2                                                                          | <input type="radio"/> Low                                |
| 3                                                                          | <input type="radio"/> Moderately                         |
| 4                                                                          | <input type="radio"/> Loud                               |
| 5                                                                          | <input type="radio"/> Very loud                          |
| <b>Do you think this sound environment annoyed?</b>                        |                                                          |
| 1                                                                          | <input type="radio"/> Not annoyed at all                 |
| 2                                                                          | <input type="radio"/> Slightly annoyed                   |
| 3                                                                          | <input type="radio"/> Moderately annoyed                 |
| 4                                                                          | <input type="radio"/> Very annoyed                       |
| 5                                                                          | <input type="radio"/> Extremely annoyed                  |

**Figure S1.** The questionnaire and each questions' scale



**Table S1** Generalized linear model between each of the perception parameters of individual sounds and five dimensions of factors (Only when p value of factors showed significance, their corresponding model's number of observations and goodness of fit were reported).

|                |         | PO                                                       |    |    |    |    | PL                                                       |    |    |    |    | PR                                                       |    |    |    |    | VS                                                       |    |    |    |    |
|----------------|---------|----------------------------------------------------------|----|----|----|----|----------------------------------------------------------|----|----|----|----|----------------------------------------------------------|----|----|----|----|----------------------------------------------------------|----|----|----|----|
|                |         | F1                                                       | F2 | F3 | F4 | F5 | F1                                                       | F2 | F3 | F4 | F5 | F1                                                       | F2 | F3 | F4 | F5 | F1                                                       | F2 | F3 | F4 | F5 |
| Natural sounds | Birds   | No. of obs =2034<br>(1/df) Deviance =1.802<br>AIC=3.429  |    |    |    |    | -                                                        |    |    |    |    | No. of obs =1559<br>(1/df) Deviance = 0.679<br>AIC=2.455 |    |    |    |    | No. of obs =1558<br>(1/df) Deviance = 0.238<br>AIC=1.409 |    |    |    |    |
|                |         | Coefficient                                              |    |    |    |    |                                                          |    |    |    |    | -0.123                                                   |    |    |    |    | 0.097                                                    |    |    |    |    |
|                |         | Sig. (2-tailed)                                          |    |    |    |    |                                                          |    |    |    |    | 0.000**                                                  |    |    |    |    | 0.000**                                                  |    |    |    |    |
|                | Insects | No. of obs =2034<br>(1/df) Deviance =1.429<br>AIC=3.198  |    |    |    |    | No. of obs =1011<br>(1/df) Deviance = 0.926<br>AIC=2.767 |    |    |    |    | No. of obs =1009<br>(1/df) Deviance =1.078<br>AIC=2.919  |    |    |    |    | No. of obs =1010<br>(1/df) Deviance = 0.167<br>AIC=1.057 |    |    |    |    |
|                |         | Coefficient                                              |    |    |    |    | 0.248                                                    |    |    |    |    | -0.159 0.079                                             |    |    |    |    | 0.046                                                    |    |    |    |    |
|                |         | Sig. (2-tailed)                                          |    |    |    |    | 0.000**                                                  |    |    |    |    | 0.000** 0.014*                                           |    |    |    |    | 0.002**                                                  |    |    |    |    |
|                | Dogs    | No. of obs =2034<br>(1/df) Deviance = 0.665<br>AIC=2.433 |    |    |    |    | No. of obs =546<br>(1/df) Deviance = 0.906<br>AIC= 2.751 |    |    |    |    | No. of obs =545<br>(1/df) Deviance =1.140<br>AIC=2.980   |    |    |    |    | -                                                        |    |    |    |    |
|                |         | Coefficient                                              |    |    |    |    | -0.045                                                   |    |    |    |    | -0.207                                                   |    |    |    |    |                                                          |    |    |    |    |
|                |         | Sig. (2-tailed)                                          |    |    |    |    | 0.012*                                                   |    |    |    |    | 0.000**                                                  |    |    |    |    |                                                          |    |    |    |    |

|                        |                 |                                                          |                                                           |                                                          |                                                           |
|------------------------|-----------------|----------------------------------------------------------|-----------------------------------------------------------|----------------------------------------------------------|-----------------------------------------------------------|
| Ducks                  |                 | No. of obs =2034<br>(1/df) Deviance = 0.605<br>AIC=2.338 | -                                                         | No. of obs =195<br>(1/df) Deviance = 0.862<br>AIC=2.720  | -                                                         |
|                        | Coefficient     | 0.035 0.054 0.042                                        |                                                           | -0.203 0.187                                             |                                                           |
|                        | Sig. (2-tailed) | 0.038* 0.002** 0.014*                                    |                                                           | 0.022* 0.010*                                            |                                                           |
| Leaves<br>rustling     |                 | No. of obs =2034<br>(1/df) Deviance =1.557<br>AIC=3.283  | No. of obs =1348<br>(1/df) Deviance = 0.869<br>AIC= 2.703 | No. of obs =1344<br>(1/df) Deviance = 0.775<br>AIC=2.588 | No. of obs =1328<br>(1/df) Deviance = 0.157<br>AIC= 0.993 |
|                        | Coefficient     | 0.192 0.062 0.054                                        | 0.052 0.054                                               | 0.053                                                    |                                                           |
|                        | Sig. (2-tailed) | 0.000** 0.025* 0.026*                                    | 0.025* 0.026*                                             | 0.000**                                                  |                                                           |
|                        |                 | *                                                        |                                                           | *                                                        |                                                           |
| Wind                   |                 | No. of obs =2034<br>(1/df) Deviance =1.584<br>AIC=3.301  | -                                                         | No. of obs =1305<br>(1/df) Deviance = 0.824<br>AIC=2.649 | -                                                         |
|                        | Coefficient     | 0.135 -0.081                                             |                                                           | 0.071                                                    |                                                           |
|                        | Sig. (2-tailed) | 0.000** 0.003**                                          |                                                           | 0.004**                                                  |                                                           |
|                        |                 | *                                                        |                                                           |                                                          |                                                           |
| Water                  |                 | No. of obs =2034<br>(1/df) Deviance =1.136<br>AIC=2.969  | No. of obs =344<br>(1/df) Deviance =1.041<br>AIC=2.895    | -                                                        | No. of obs =345<br>(1/df) Deviance = 0.085<br>AIC= 0.390  |
|                        | Coefficient     | 0.094 0.078                                              | 0.192                                                     |                                                          | -0.049                                                    |
|                        | Sig. (2-tailed) | 0.000** 0.001**                                          | 0.006**                                                   |                                                          | 0.002*                                                    |
|                        |                 | *                                                        |                                                           |                                                          | *                                                         |
| Mech Square<br>dancing |                 | No. of obs =2034<br>(1/df) Deviance =1.779               | No. of obs =664<br>(1/df) Deviance =1.276                 | No. of obs =664<br>(1/df) Deviance =1.103                | No. of obs =662<br>(1/df) Deviance = 0.149                |

|                   |                   |                 |                         |  |  |  |                        |  |  |  |                         |  |  |  |                         |  |  |  |
|-------------------|-------------------|-----------------|-------------------------|--|--|--|------------------------|--|--|--|-------------------------|--|--|--|-------------------------|--|--|--|
| Artificial sounds | Broadcast music   |                 | AIC=3.417               |  |  |  | AIC=3.091              |  |  |  | AIC=2.945               |  |  |  | AIC= 0.943              |  |  |  |
|                   |                   | Coefficient     | -0.162                  |  |  |  | -0.132                 |  |  |  | -0.263 -0.166           |  |  |  | 0.066                   |  |  |  |
|                   |                   | Sig. (2-tailed) | 0.000**                 |  |  |  | 0.003**                |  |  |  | 0.000** 0.000**         |  |  |  | 0.000**                 |  |  |  |
|                   |                   |                 | *                       |  |  |  |                        |  |  |  | * *                     |  |  |  | *                       |  |  |  |
|                   | Singing           |                 | No. of obs =2034        |  |  |  | -                      |  |  |  | No. of obs =1306        |  |  |  | No. of obs =1243        |  |  |  |
|                   |                   |                 | (1/df) Deviance =2.387  |  |  |  |                        |  |  |  | (1/df) Deviance = 0.947 |  |  |  | (1/df) Deviance = 0.215 |  |  |  |
|                   |                   |                 | AIC=3.710               |  |  |  |                        |  |  |  | AIC=2.788               |  |  |  | AIC=1.309               |  |  |  |
|                   |                   | Coefficient     | 0.155                   |  |  |  |                        |  |  |  | -0.054 -0.077           |  |  |  | 0.059                   |  |  |  |
|                   | Instrument        | Sig. (2-tailed) | 0.000**                 |  |  |  |                        |  |  |  | 0.048* 0.004**          |  |  |  | 0.000**                 |  |  |  |
|                   |                   |                 | *                       |  |  |  |                        |  |  |  |                         |  |  |  | *                       |  |  |  |
|                   |                   |                 | No. of obs =2034        |  |  |  | No. of obs =380        |  |  |  | No. of obs =379         |  |  |  | No. of obs =371         |  |  |  |
|                   |                   |                 | (1/df) Deviance =1.317  |  |  |  | (1/df) Deviance =1.124 |  |  |  | (1/df) Deviance =1.104  |  |  |  | (1/df) Deviance = 0.132 |  |  |  |
|                   | Lawn mowing       |                 | AIC=3.116               |  |  |  | AIC=2.970              |  |  |  | AIC=2.952               |  |  |  | AIC= 0.833              |  |  |  |
|                   |                   | Coefficient     | -0.155 -0.111 -0.058    |  |  |  | -0.064 -0.122 -0.103   |  |  |  | -0.164 -0.134           |  |  |  | 0.069                   |  |  |  |
|                   |                   | Sig. (2-tailed) | 0.000** 0.000** 0.021*  |  |  |  | 0.011* 0.012* 0.048*   |  |  |  | 0.003* 0.015*           |  |  |  | 0.000**                 |  |  |  |
|                   |                   |                 | * *                     |  |  |  |                        |  |  |  | *                       |  |  |  | *                       |  |  |  |
|                   | Artificial sounds |                 | -                       |  |  |  | -                      |  |  |  | -                       |  |  |  | -                       |  |  |  |
|                   |                   | Coefficient     |                         |  |  |  |                        |  |  |  |                         |  |  |  |                         |  |  |  |
|                   |                   | Sig. (2-tailed) |                         |  |  |  |                        |  |  |  |                         |  |  |  |                         |  |  |  |
|                   | Lawn mowing       |                 | No. of obs =2034        |  |  |  | No. of obs =117        |  |  |  | -                       |  |  |  | -                       |  |  |  |
|                   |                   |                 | (1/df) Deviance = 0.201 |  |  |  | (1/df) Deviance =1.018 |  |  |  |                         |  |  |  |                         |  |  |  |
|                   |                   |                 | AIC=1.239               |  |  |  | AIC=2.906              |  |  |  |                         |  |  |  |                         |  |  |  |
|                   | Artificial sounds | Coefficient     | 0.031 0.019 -0.023      |  |  |  |                        |  |  |  | -0.228                  |  |  |  |                         |  |  |  |
|                   |                   | Sig. (2-tailed) | 0.002** 0.049* 0.021*   |  |  |  |                        |  |  |  | 0.028*                  |  |  |  |                         |  |  |  |

|                    |                 |                                                          |         |         |   |                                                          |         |         |                                                         |
|--------------------|-----------------|----------------------------------------------------------|---------|---------|---|----------------------------------------------------------|---------|---------|---------------------------------------------------------|
| Construction sound |                 | No. of obs =2034<br>(1/df) Deviance = 0.981<br>AIC=2.822 |         |         | - | No. of obs =528<br>(1/df) Deviance = 0.550<br>AIC=2.251  |         |         | No. of obs =525<br>(1/df) Deviance = 0.207<br>AIC=1.276 |
|                    | Coefficient     | 0.090                                                    | 0.058   |         |   | -0.088                                                   | 0.095   |         |                                                         |
|                    | Sig. (2-tailed) | 0.000**                                                  | 0.008** |         |   | 0.004**                                                  | 0.004** | 0.007** |                                                         |
| Engine             |                 | No. of obs =2034<br>(1/df) Deviance = 0.534<br>AIC=2.215 |         |         | - | No. of obs =180<br>(1/df) Deviance = 0.936<br>AIC=2.805  |         |         | -                                                       |
|                    | Coefficient     | 0.035                                                    | 0.038   | 0.044   |   |                                                          | -0.270  |         |                                                         |
|                    | Sig. (2-tailed) | 0.027*                                                   | 0.017*  | 0.006** |   |                                                          | 0.000** |         |                                                         |
| Bicycle riding     |                 | No. of obs =2034<br>(1/df) Deviance = 0.783<br>AIC=2.596 |         |         | - | No. of obs =548<br>(1/df) Deviance = 0.764<br>AIC=2.580  |         |         | -                                                       |
|                    | Coefficient     | 0.070                                                    | -0.066  | -0.047  |   | -0.076                                                   |         |         |                                                         |
|                    | Sig. (2-tailed) | 0.000**                                                  | 0.001** | 0.016*  |   | 0.030*                                                   |         |         |                                                         |
| Surrounding speech |                 | No. of obs =2034<br>(1/df) Deviance =1.441<br>AIC=3.206  |         |         | - | No. of obs =1943<br>(1/df) Deviance = 0.789<br>AIC=2.604 |         |         | -                                                       |
|                    | Coefficient     | 0.210                                                    | -0.151  | 0.071   |   | 0.088                                                    | -0.096  |         |                                                         |
|                    | Sig. (2-tailed) | 0.000**                                                  | 0.000** | 0.007*  |   | 0.000**                                                  | 0.000** |         |                                                         |

|                  |                 |                                                          |         |         |                                                          |         |                                                          |         |         |                                                           |         |
|------------------|-----------------|----------------------------------------------------------|---------|---------|----------------------------------------------------------|---------|----------------------------------------------------------|---------|---------|-----------------------------------------------------------|---------|
| Playing children |                 | No. of obs =2034<br>(1/df) Deviance = 1.722<br>AIC=3.384 |         |         | No. of obs =1560<br>(1/df) Deviance = 0.870<br>AIC=2.702 |         | No. of obs =1561<br>(1/df) Deviance = 0.914<br>AIC=2.752 |         |         | No. of obs =1550<br>(1/df) Deviance = 0.071<br>AIC= 0.208 |         |
|                  | Coefficient     | 0.273                                                    | 0.068   | -0.255  | 0.099                                                    | -0.095  | -0.213                                                   | -0.102  | -0.090  |                                                           | -0.013  |
|                  | Sig. (2-tailed) | 0.000**                                                  | 0.019*  | 0.000** | 0.000**                                                  | 0.000** | 0.000**                                                  | 0.000** | 0.000** |                                                           | 0.041*  |
|                  |                 | *                                                        |         | *       | *                                                        | *       | *                                                        | *       | *       |                                                           |         |
| Footsteps        |                 | No. of obs =2034<br>(1/df) Deviance =1.738<br>AIC=3.394  |         |         | No. of obs =1602<br>(1/df) Deviance = 0.827<br>AIC=2.652 |         | No. of obs =1603<br>(1/df) Deviance = 0.633<br>AIC=2.385 |         |         | No. of obs =1591<br>(1/df) Deviance = 0.086<br>AIC= 0.397 |         |
|                  | Coefficient     | 0.231                                                    |         | -0.065  |                                                          | -0.051  | -0.066                                                   | -0.148  | -0.071  |                                                           | 0.020   |
|                  | Sig. (2-tailed) | 0.000**                                                  |         | 0.026*  |                                                          | 0.027*  | 0.003*                                                   | 0.000** | 0.000** |                                                           | 0.010*  |
|                  |                 | *                                                        |         |         |                                                          | *       | *                                                        | *       | *       |                                                           |         |
| Diabolo          |                 | No. of obs =2034<br>(1/df) Deviance = 0.287<br>AIC=1.594 |         |         | -                                                        |         | -                                                        |         |         | -                                                         |         |
|                  | Coefficient     | -0.053                                                   |         | 0.041   |                                                          |         |                                                          |         |         |                                                           | 0.040   |
|                  | Sig. (2-tailed) | 0.000**                                                  |         | 0.000** |                                                          |         |                                                          |         |         |                                                           | 0.001** |
|                  |                 | *                                                        |         | *       |                                                          |         |                                                          |         |         |                                                           |         |
| Train            |                 | No. of obs =2034<br>(1/df) Deviance = 0.456<br>AIC=2.057 |         |         | -                                                        |         | No. of obs =177<br>(1/df) Deviance = 0.627<br>AIC=2.404  |         |         | -                                                         |         |
|                  | Coefficient     | 0.073                                                    | 0.073   | -0.054  |                                                          |         |                                                          |         | -0.159  |                                                           |         |
|                  | Sig. (2-tailed) | 0.000**                                                  | 0.000** | 0.000** |                                                          |         |                                                          |         | 0.008** |                                                           |         |
|                  |                 | *                                                        | *       | *       |                                                          |         |                                                          |         |         |                                                           |         |

|            |                 |                                                          |         |         |         |                                                         |         |                                                         |         |                                                         |  |
|------------|-----------------|----------------------------------------------------------|---------|---------|---------|---------------------------------------------------------|---------|---------------------------------------------------------|---------|---------------------------------------------------------|--|
| Automobile |                 | No. of obs =2034<br>(1/df) Deviance =2.056<br>AIC=3.561  |         |         |         | No. of obs =823<br>(1/df) Deviance =1.051<br>AIC=2.895  |         | No. of obs =822<br>(1/df) Deviance = 0.923<br>AIC=2.765 |         | No. of obs =802<br>(1/df) Deviance = 0.166<br>AIC=1.051 |  |
|            | Coefficient     | -0.067                                                   | 0.141   | -0.146  | -0.149  | -0.121                                                  | 0.085   | -0.138                                                  | -0.174  | 0.043                                                   |  |
|            | Sig. (2-tailed) | 0.035*                                                   | 0.000** | 0.000** | 0.000** | 0.001**                                                 | 0.013*  | 0.000**                                                 | 0.000** | 0.005**                                                 |  |
|            |                 | *                                                        |         | *       | *       |                                                         |         | *                                                       | *       |                                                         |  |
| Motorbike  |                 | No. of obs =2034<br>(1/df) Deviance = 0.526<br>AIC=2.199 |         |         |         | No. of obs =269<br>(1/df) Deviance = 0.999<br>AIC=2.859 |         | No. of obs =268<br>(1/df) Deviance = 0.820<br>AIC=2.661 |         | -                                                       |  |
|            | Coefficient     | -0.071                                                   | -0.056  | -0.049  | -0.035  | -0.068                                                  | -0.167  | -0.253                                                  | -0.125  |                                                         |  |
|            | Sig. (2-tailed) | 0.000**                                                  | 0.000** | 0.002** | 0.027*  | 0.000**                                                 | 0.006** | 0.000**                                                 | 0.019*  |                                                         |  |
|            |                 | *                                                        | *       |         | *       |                                                         | *       |                                                         |         |                                                         |  |

Notes: F1: Age and familiarity of site, F2: Educational and Economic condition, F3: Companion and type of recreational use, F4: Gender, F5: Length of Stay. Significant differences are marked with \*(p < 0.05), \*\* (p< 0.01) and \*\*\*(p<0.001).
